# Supplementary material
Source: Springer Nature journal article supplement (https://www.springermedizin.de/resource/supplementary/13058_2011_2936_MOESM4_ESM.pdf/9702920)

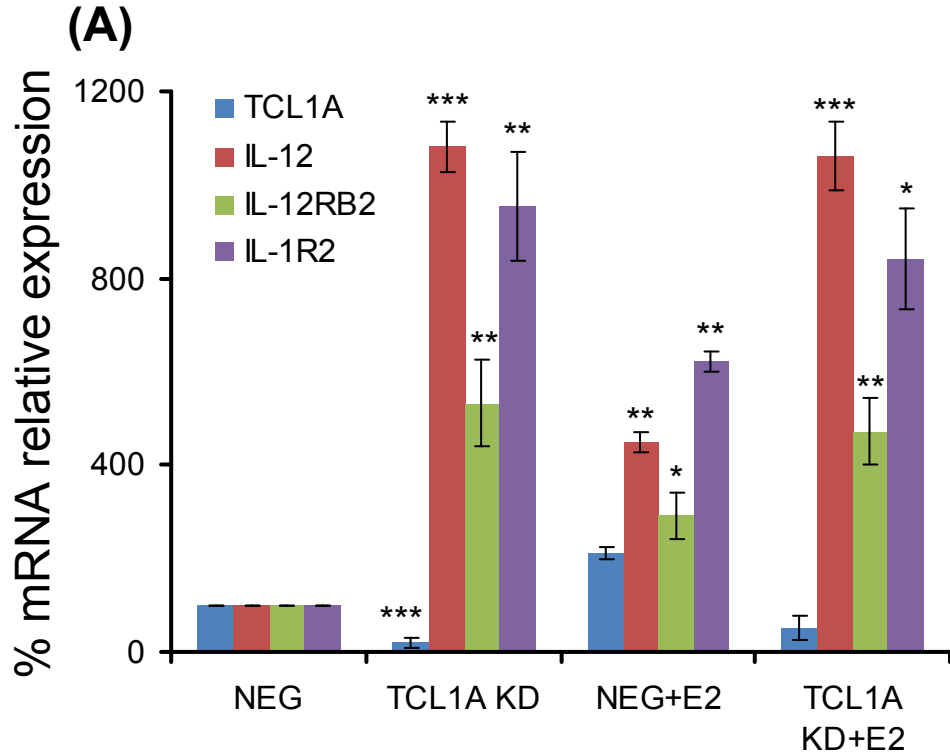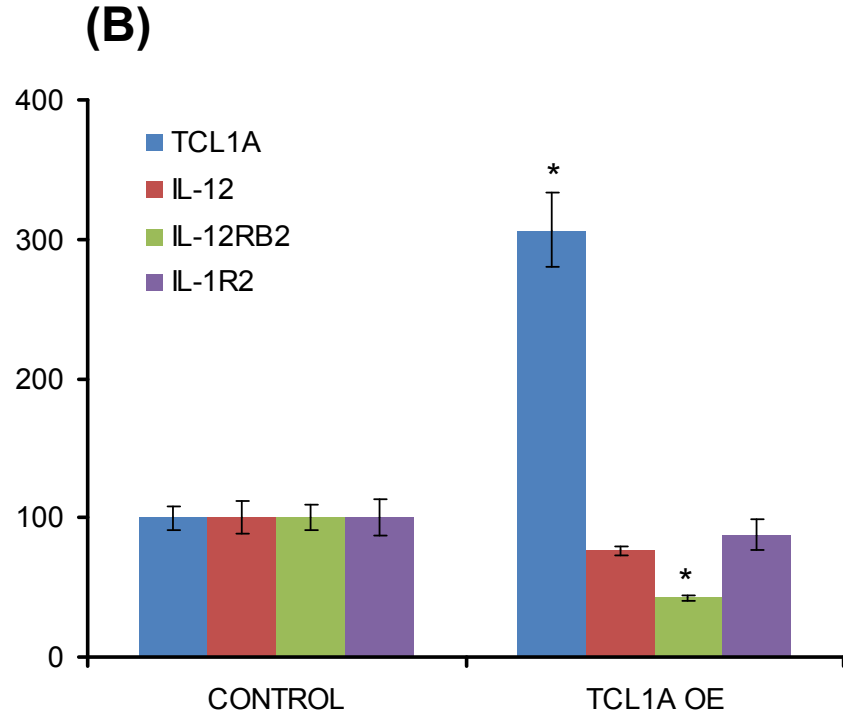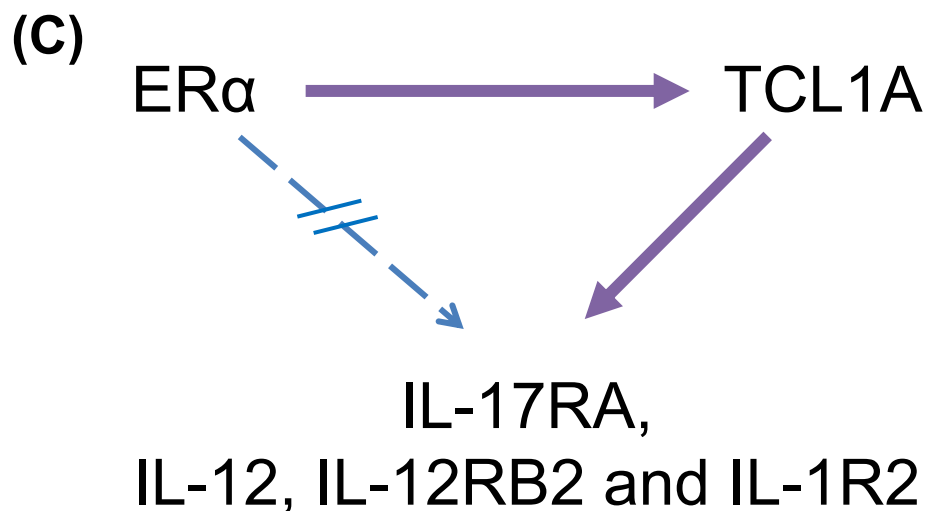

\* P < 0.05  
 \*\* P < 0.01  
 \*\*\* P < 0.001  
 vs neg siRNA value

Supplement: MOESM4 [file 9702920]
